1 **Typically asymptomatic but with robust antibody formation: Children's unique**  
2 **humoral immune response to SARS-CoV-2**

3 Hanna Renk MD<sup>1\*</sup>, Alex Dulovic Dr.rer.nat<sup>2\*</sup>, Matthias Becker M.Sc<sup>2</sup>, Dorit Fabricius MD<sup>3</sup>, Maria Zernickel<sup>3</sup>, Daniel  
4 Junker M.Sc<sup>2</sup>, Alina Seidel M.Sc<sup>4</sup>, Rüdiger Groß M.Sc<sup>4</sup>, Alexander Hilger M.Sc<sup>5</sup>, Sebastian Bode MD<sup>3</sup>, Linus  
5 Fritsch<sup>5</sup>, Pauline Frieh<sup>5</sup>, Anneke Haddad DPhil<sup>5</sup>, Tessa Görne<sup>5</sup>, Jonathan Remppis MD<sup>1</sup>, Tina Ganzmueller MD<sup>7</sup>,  
6 Andrea Dietz Dr.biol.hum<sup>6</sup>, Daniela Huzly MD<sup>8</sup>, Hartmut Hengel MD<sup>8</sup>, Klaus Kaier PhD<sup>9</sup>, Susanne Weber PhD<sup>9</sup>,  
7 Eva-Maria Jacobsen PhD<sup>3</sup>, Philipp D. Kaiser Dr.rer.nat<sup>2</sup>, Bjoern Traenkle Dr.rer.nat<sup>2</sup>, Ulrich Rothbauer Dr.rer.nat<sup>2</sup>,  
8 Maximilian Stich MD<sup>10</sup>, Burkhard Tönshoff<sup>10</sup>, Georg F. Hoffmann<sup>10</sup>, Barbara Müller PhD<sup>10,11</sup>, Carolin Ludwig<sup>12,13,14</sup>,  
9 Bernd Jahrsdörfer MD<sup>12,13,14</sup>, Hubert Schrezenmeier MD<sup>12,13,14</sup>, Andreas Peter MD<sup>15</sup>, Sebastian Hörber MD<sup>15</sup>,  
10 Thomas Iftner PhD<sup>7</sup>, Jan Münch PhD<sup>4</sup>, Thomas Stamminger MD<sup>6</sup>, Hans-Jürgen Groß MD<sup>16</sup>, Martin Wolkewitz  
11 PhD<sup>9</sup>, Corinna Engel Dr.biol.hum<sup>1,17</sup>, Marta Rizzi MD<sup>18</sup>, Philipp Henneke MD<sup>5,19</sup>, Axel R. Franz MD<sup>1,17</sup>, Klaus-  
12 Michael Debatin MD<sup>3</sup>, Nicole Schneiderhan-Marra Dr.rer.nat<sup>2</sup>, Ales Janda MD<sup>3,#</sup> and Roland Elling MD<sup>5,19,#,†</sup>

13 1 – University Children's Hospital Tübingen, Tübingen, Germany

14 2 – NMI Natural and Medical Sciences Institute at the University of Tübingen, Reutlingen, Germany

15 3 – Department of Pediatrics and Adolescent Medicine, Ulm University Medical Center, Ulm University, Ulm,  
16 Germany

17 4 – Institute of Molecular Virology, Ulm University, Ulm, Germany

18 5 – Center for Pediatrics and Adolescent Medicine, Medical Center Freiburg, Germany and

19 Faculty of Medicine, University of Freiburg, Freiburg, Germany

20 6 – Institute of Virology, Ulm University Medical Center, Ulm, Germany

21 7 – Institute for Medical Virology and Epidemiology of Viral Diseases, University Hospital Tübingen, Tübingen,  
22 Germany

23 8 – Institute of Virology, University Medical Center Freiburg, Germany and Faculty of Medicine, University of  
24 Freiburg, Freiburg, Germany

25 9 – Institute of Medical Biometry and Statistics, Faculty of Medicine and Medical Center, University of Freiburg,  
26 Freiburg, Germany

27 10 – Department of Pediatrics I, University Children's Hospital Heidelberg, Heidelberg, Germany

28 11 - Department of Infectious Diseases, Virology, Heidelberg University, Heidelberg, Germany

29 12 – Department of Transfusion Medicine, Ulm University, Ulm, Germany

30 13 – Institute for Clinical Transfusion Medicine and Immunogenetics

31 14– German Red Cross Blood Transfusion Service, Baden-Württemberg, Germany

32 15 – Institute for Clinical Chemistry and Pathobiochemistry, University Hospital Tübingen, Tübingen, Germany

33 16 – Institute of Clinical Chemistry, Ulm University, Ulm, Germany

34 17 – Center for Pediatric Clinical Studies, University Hospital Tübingen, Tübingen, Germany

35 18 - Department of Rheumatology and Clinical Immunology, Freiburg University Medical Center, Faculty of

36 Medicine, University of Freiburg, Freiburg, Germany

37 19 – Institute for Immunodeficiency, University Medical Center Freiburg, Freiburg, Germany

38

39 \*indicates shared first authorship

40 #indicates shared last authorship

41 †indicates corresponding author

42

### 43 **Correspondence**

44 Roland Elling, MD

45 Center for Pediatrics and Adolescent Medicine, University Medical Center Freiburg, Mathildenstr. 1, 79106

46 Freiburg, Germany

47 Email: [roland.elling@uniklinik-freiburg.de](mailto:roland.elling@uniklinik-freiburg.de); phone: +49-761-270-43000; fax: +49-761-270-45010

48

49 **Running Title:** SARS-CoV-2 serology in children

50

### 51 **Competing Interests**

52 NSM was a speaker at Luminex user meetings in the past. The Natural and Medical

53 Sciences Institute at the University of Tübingen is involved in applied research projects as a

54 fee for services with Luminex. The other authors report no competing interests.

55

56 **Abstract**

57 *Background:* Long-term persistence of antibodies against SARS-CoV-2, particularly the  
58 SARS-CoV-2 Spike Trimer, determines individual protection against infection and potentially  
59 viral spread. The quality of children's natural humoral immune response following SARS-  
60 CoV-2 infection is yet incompletely understood but crucial to guide pediatric SARS-CoV-2  
61 vaccination programs.

62 *Methods:* In this prospective observational multi-center cohort study, we followed 328  
63 households, consisting of 548 children and 717 adults, with at least one member with a  
64 previous laboratory-confirmed SARS-CoV-2 infection. The serological response was  
65 assessed at 3-4 months and 11-12 months after infection using a bead-based multiplex  
66 immunoassay for 23 human coronavirus antigens including SARS-CoV-2 and its Variants of  
67 Concern (VOC) and endemic human coronaviruses (HCoVs), and additionally by three  
68 commercial SARS-CoV-2 antibody assays.

69 *Results:* Overall, 33.76% of SARS-CoV-2 exposed children and 57.88% adults were  
70 seropositive. Children were five times more likely to have seroconverted without symptoms  
71 compared to adults. Despite the frequently asymptomatic course of infection, children had  
72 higher specific antibody levels, and their antibodies persisted longer than in adults (96.22%  
73 versus 82.89% still seropositive 11-12 months post infection). Of note, symptomatic and  
74 asymptomatic infections induced similar humoral responses in all age groups. In  
75 symptomatic children, only dysgeusia was found as diagnostic indicator of COVID-19. SARS-  
76 CoV-2 infections occurred independent of HCoV serostatus. Antibody binding responses to  
77 VOCs were similar in children and adults, with reduced binding for the Beta variant in both  
78 groups.

79 *Conclusions:* The long-term humoral immune response to SARS-CoV-2 infection in children  
80 is robust and may provide long-term protection even after asymptomatic infection.

81 (Study ID at German Clinical Trials Register: 00021521)

## 82 **Introduction**

83 To date, our knowledge of children's immune response to infection with severe acute  
84 respiratory syndrome coronavirus type 2 (SARS-CoV-2) remains incomplete. In light of  
85 current debates on vaccination strategies and nonpharmaceutical preventative measures  
86 (e.g. school closures), a comprehensive understanding of protective immunity after natural  
87 infection in children is required. As with other viral infections, immune control of SARS-CoV-2  
88 is achieved through a concerted interplay of humoral and cellular immunity (reviewed in <sup>1,2</sup>).  
89 Neutralizing antibodies in children are of particular interest in this context, given their role in  
90 blocking virus entry into cells by inhibiting the interaction between the viral receptor binding  
91 domain (RBD) within the S-glycoprotein and the angiotensin-converting enzyme 2 (ACE2)  
92 receptor<sup>3</sup>.

93 Previous longitudinal studies of the humoral response have found that neutralizing antibodies  
94 peak within 3-5 weeks post-infection with a calculated half-life of up to 8 months, suggesting  
95 long-term protection in convalescent individuals<sup>1,4-6</sup>. However, most studies only included  
96 adults, and longitudinal studies on SARS-CoV-2 infections in children had limited sample  
97 size and duration of follow-up post-infection<sup>7-17</sup>. Furthermore, it remains unclear as to  
98 whether any form of cross-protection is offered by endemic human coronaviruses (HCoVs)  
99 that regularly circulate in the pediatric population, with some studies identifying cross-  
100 protection and others not.<sup>18,19</sup>

101 To provide an in-depth characterization of the humoral response in children, we initiated a  
102 multi-center longitudinal study, encompassing 328 households each with at least one SARS-  
103 CoV-2-infected member, which were followed for up to 12 months after the first infection in  
104 each household. This cohort is unique as the subjects exhibited mainly asymptomatic or mild  
105 disease with uninfected family members serving as environmental and age-matched  
106 controls. We performed an extensive serological evaluation of SARS-CoV-2 infection in all  
107 household members, comprising analyses of production of antibodies against various SARS-  
108 CoV-2 antigens, including Variants of Concern (VOCs), production of neutralizing antibodies  
109 and the role of endemic human coronaviruses (HCoVs).

## 110 **Materials and Methods**

### 111 Cohort

112 This study forms part of a non-interventional, prospective observational national multi-center  
113 cohort study, including 553 children and 726 adults from 328 households each with at least  
114 one individual with a SARS-CoV-2 reverse-transcriptase polymerase chain reaction (RT-  
115 PCR) proven infection and/or a symptomatic and later serologically proven infection.  
116 Participants were recruited during the first wave of the pandemic (May to August 2020) via  
117 local health authorities and an in-hospital database of households with at least one  
118 laboratory-confirmed SARS-CoV-2 infection. A full list of the inclusion and exclusion criteria  
119 are in the **Supplementary Appendix**.

### 120 Study oversight

121 This part of the study was conducted by the University Children's Hospitals in Freiburg,  
122 Tübingen and Ulm, Germany. Ethics approval was obtained from the respective Medical  
123 Faculties' independent ethics committees (University of Freiburg: 256/20\_201553; University  
124 of Tübingen: 293/2020BO2; University of Ulm: 152/20). Written informed consent was  
125 obtained from adult participants and from parents or legal guardians on behalf of their  
126 children at both sampling time points. Children's preferences on whether or not to provide a  
127 blood sample were respected throughout. This study was registered at the German Clinical  
128 Trials Register (DRKS), study ID 00021521, conducted according to the Declaration of  
129 Helsinki, and designed, analyzed and reported according to the Strengthening the Reporting  
130 of Observational Studies in Epidemiology (STROBE) reporting guidelines.

### 131 Sample collection

132 Samples were collected at two separate time points, an early time point (T1) at a median of  
133 109 days (IQR 67-122 days) after earliest symptom onset in household and a late time point  
134 (T2) at 340 days (IQR 322-356 days) post-symptom onset (**Table 1, Figure S1 in**  
135 **Supplementary Appendix**).

136 Serological assays

137 Antibodies against SARS-CoV-2 in 2236 samples were detected using the following four  
138 assays: (1) EuroImmun-Anti-SARS-CoV-2 ELISA IgG and IgA (S1), (2) Siemens  
139 Healthineers SARS-CoV-2 IgG (RBD), (3) Roche Elecsys Ig (N) and (4) MULTICOV-AB, a  
140 previously published bead-based multiplex immunoassay that simultaneously analyses  
141 antibody binding to 23 antigens from SARS-CoV-2 (including VOCs)<sup>20,21</sup>. Seropositivity was  
142 defined as any three of the four SARS-CoV-2 assays being positive. The MULTICOV-AB  
143 assay also analyses antibody binding to endemic coronavirus antigens (i.e. HCoV-OC43, -  
144 NL63, -HKU1 and -229E)<sup>20,21</sup>. 385 samples were analyzed with the GenScript SARS-CoV-2  
145 Surrogate Virus Neutralization Test (sVNT). See the **Supplementary Appendix** for details  
146 on the assay methodology.

147 Data collection

148 Children and adults from eligible households were asked to provide information on  
149 demography and presence of symptoms (fever, cough, diarrhea or dysgeusia) in temporal  
150 relation to RT-PCR-proven or symptomatic and later serologically proven SARS-CoV-2  
151 infection within the household. The four symptoms were chosen based on previous research  
152 and public health advice at the time. “Symptomatic infections” were defined by seropositivity  
153 and a history of at least one of these four symptoms in temporal relationship to exposure.  
154 Seropositivity in individuals who did not show any of these four symptoms was defined as  
155 “asymptomatic infection”. For most households, the earliest confirmed PCR-positive infection  
156 (“index case”) could be determined (see **Supplementary Appendix** for further information).

157 Statistical Analysis

158 All data analysis was performed in RStudio (Version 1.2.5001), running R (version 3.6.1) with  
159 the additional packages “beeswarm”, “Rcolorbrewer”, “gplots” and “VennDiagram”. The type  
160 of statistical analysis performed and (where appropriate) the subset of the study population  
161 used is listed in the figure legends. Between-group differences of continuous endpoints were  
162 analyzed using Mann-Whitney-U tests while correlation was analyzed using the Spearman

163 rank. All analyses were exploratory in nature and p-values may not be interpreted as  
164 confirmatory. A comprehensive material and methods section including detailed protocols  
165 can be found in the **Supplementary Appendix**.

166

167 **Results**

168 548 children and 717 adults from 328 households were examined at T1 and 279 households  
169 including 402 children and 569 adults were followed to T2 (see Methods and Appendix for full  
170 details, **Table 1** for a description of the study population, **Figure S2** in the **Supplementary**  
171 **Appendix** for details on the age structure of the study population). Children were  
172 substantially less often seropositive (33.76% at T1, 37.56% at T2) than adults (57.88% at T1,  
173 49.56% at T2) (**Table 1**). Seropositive participants were almost exclusively mildly or  
174 asymptotically infected. In seropositive individuals, asymptomatic infections were five  
175 times more common in children (44.86% T1, 45.70% T2) than in adults (8.67% T1, 10.99%  
176 T2) (**Table 1**), with the proportion of asymptomatic infections decreasing with increasing age  
177 (**Figure S3**). Overall, hospitalization was rare (3.61% of adults, 0% of children, **Table 1**). The  
178 performance of the four serological assays for children and adults at T1 and T2 is shown in  
179 **Table S1 and Figure S4**.

180 The detailed humoral immune response against different SARS-CoV-2 antigens, assessed  
181 by MULTICOV-AB is shown in **Figure 1**. Children had significantly higher antibody titers  
182 against spike ( $p < 0.001$ ), RBD ( $p < 0.001$ ), S1 domain ( $p < 0.001$ ) and nucleocapsid ( $p = 0.01$ )  
183 compared to adults at T1. This increased response was confirmed by the three commercial  
184 assays (**Figure S5**). In addition, we observed a large difference in seroreversion, with only  
185 3.78% of children, but 17.11% of adults seroreverting between T1 and T2 (**Table 1**).  
186 Seroreversion was not associated with the response to particular antigens, although the  
187 largest and smallest decay in antibody concentrations were observed for antibodies against  
188 the S2 domain and nucleocapsid, respectively, regardless of age (**Figure S6**).

189 For both children and adults, there was no significant difference in antibody response  
190 between symptomatic and asymptomatic infections (**Figure 2a and b, Figure S7**). The  
191 frequency of reported symptoms differed between adults and children and the predictive  
192 value of each symptom varied between both groups (**Figure 2c and d**). While any of the  
193 symptoms fever, cough, diarrhea or dysgeusia proved to be a good indicator of infection in



194 adults, dysgeusia was by far the best predictive symptom in children (87.50% of children with  
195 dysgeusia were seropositive; 95% CI 71.39%-95.15%, 30.52% of children without dysgeusia  
196 were seropositive for SARS-CoV-2, 95% CI 29.74%-31.30% **Figure 2d**). Conversely, cough  
197 was a poor predictor of SARS-CoV-2 infection in children (37.37% of children with a cough  
198 were seropositive; 95% CI 29.25%-46.28%, 33.04% of children without a cough were  
199 seropositive; 95% CI 30.99%-35.15%, **Figure 2d**). Further examination of predictive  
200 symptoms among children showed that in contrast to dysgeusia, cough only gained  
201 predictive value in children above the age of 12 and the predictive value of fever increased  
202 with age (**Table S2**). There was no difference in the humoral response associated with the  
203 presence of particular symptoms in either adults or children (**Figure S8**).

204 To further explore differences in the antibodies produced by children and adults, we analyzed  
205 their neutralization potential in a surrogate assay (sVNT) as well as their binding towards  
206 VOCs. The neutralizing potential of children's sera exceeded that of adults' at T1 ( $p < 0.001$ )  
207 and T2 ( $p = 0.02$ ) (**Figure 3a**). However, this could be attributed to antibody titers, as  
208 neutralization in children correlated with the S1-directed antibody response (Spearman's  
209 rank 0.86, **Figure 3b**). There was no difference in antibody binding responses to the RBD of  
210 Alpha and Beta VOCs between adults and children, with an identical binding for the Alpha  
211 variant compared to wild-type (Spearman's rank 0.95, **Figure 3c**) and a reduction in binding  
212 for the Beta variant (Spearman's rank 0.69, **Figure 3d**).

213 Seroprevalence against endemic coronaviruses rose sharply with age in early childhood, and  
214 was stable in older children, adolescents and adults independent of age (**Figure 4a, Figure**  
215 **S9**). In contrast to SARS-CoV-2 seroreversion, HCoV antibody titers decreased faster in  
216 younger children than in adults (**Figure S10**). There were HCoV naïve samples in this cohort  
217 and some individuals showed a substantial increase in HCoV antibody response indicating  
218 exposure towards endemic HCoVs between the two time points (**Figure 4b in red, Figure**  
219 **S11**). Amongst SARS-CoV-2 exposed individuals in households with a defined index case  
220 (index cases excluded from the analysis, see Methods), there was no difference in HCoV  
221 antibody titers between SARS-CoV-2 seropositive and seronegative children or adults

222 (p=0.21, **Figure 4c, Figure S12**). In addition, we assessed whether SARS-CoV-2 infection  
223 boosted HCoV antibody responses, however there was no evidence for an association  
224 between HCoV antibody responses and SARS-CoV-2 antibody responses in exposed  
225 children or adults (Spearman's rank 0.03, **Figure 4d**).

226

227

228

## 229 **Discussion**

230 To our knowledge, this is the largest prospective multi-center study comprehensively  
231 comparing the adult and pediatric longitudinal humoral immune response following SARS-  
232 CoV-2 household exposure. As the humoral immunity against SARS-CoV-2 is now  
233 increasingly accepted as the central correlate of protection<sup>22-24</sup>, improving our incomplete  
234 understanding in children<sup>25,26</sup> is of considerable value for public health and vaccination  
235 strategies. Importantly, our outpatient cohort has high epidemiological relevance, as a mild  
236 course is the most frequent outcome of SARS-CoV-2 infection overall<sup>27</sup>. Our findings identify  
237 several unique features of the pediatric serological immune response against SARS-CoV-2.

238 Children had a lower seroprevalence after household exposure and seropositivity followed  
239 asymptomatic infection more frequently than in adults. This is in agreement with our previous  
240 report of a different cohort consisting of parent-child pairs<sup>28</sup>. In light of potential pediatric  
241 vaccination campaigns, children's humoral response to SARS-CoV-2 is markedly increased  
242 in both quantity and longevity, with children seroreverting significantly slower than adults.  
243 Children generated a higher titers of SARS-CoV-2 antibodies than their parents after being  
244 exposed to the same viral strain, and antibody titers are negatively correlated with age. Of  
245 particular interest are the increase in antibodies produced against the S1 domain and RBD,  
246 both of which are associated with higher neutralization capacity, indicating that children  
247 produce a high quality humoral response against SARS-CoV-2<sup>3,22,29</sup>. The quality of the  
248 pediatric humoral response is further illustrated by the similar binding capacity against the  
249 SARS-CoV-2 Alpha and Beta VOCs compared to adults. Children also had significantly  
250 higher neutralizing antibody titers than adults, indicating increased protection. This increase  
251 in neutralization was directly correlated with higher antibody titers in the other assays, and  
252 therefore may not be due to substantial qualitative changes of the pediatric antibody profiles.  
253 These findings are in line with one preprinted study<sup>30</sup> but in contrast to two previous studies,  
254 which found that children generated a lower humoral response to SARS-CoV-2 than adults,  
255 with a corresponding reduction in neutralization activity<sup>11,13</sup>. However, compared to our  
256 cohort, all three studies were substantially smaller in sample size and the latter two

257 investigated a different disease spectrum comprising mostly hospitalized children or those  
258 diagnosed with hyperinflammatory MIS-C syndrome, and sampled blood at earlier time  
259 points after presumed infection.

260 It is striking that antibody levels in seropositive individuals were independent of fever, cough  
261 or diarrhea, as clinical proxies for systemic or localized inflammation of the respiratory or  
262 gastrointestinal tract, respectively. Previous studies have reported a clear correlation  
263 between disease severity and neutralizing antibody titers in adults<sup>6,31</sup>. At the other end of the  
264 disease spectrum with mildly affected younger adults and children, this association was not  
265 detectable irrespective of age. This diverges from the classical infection immunology dogma  
266 that systemic pathogen-host interaction is required for the generation of robust immune  
267 memory. While titers themselves did not differ between asymptomatic and symptomatic  
268 infections, we found substantial differences in titers between adults and children. Presence of  
269 any symptom was predictive of seropositivity in adults, whereas children showed substantial  
270 differences in both the prevalence of symptoms in seropositive individuals and the predictive  
271 values of symptoms with respect to SARS-CoV-2 seropositivity. Since cough was a relatively  
272 common symptom in children irrespective of seroconversion, it was not useful in predicting  
273 SARS-CoV-2 infection. In contrast, dysgeusia, an infrequent symptom among children, was  
274 highly accurate in predicting infection. These findings suggest that symptom criteria used for  
275 subsequent PCR testing need to be different for children and adults.

276 Similarly to other authors<sup>32,33</sup>, we identified that exposure to HCoVs, as measured by  
277 seropositivity typically happens within the first five years of life. The relatively small decline of  
278 HCoV antibody levels during the study period, especially in the adult population, in  
279 comparison to the decline in SARS-CoV-2 antibody levels after a single infection suggests  
280 that long-term serological immunity against HCoVs may be driven by recurrent exposure. We  
281 observed HCoV infections in previously naïve individuals, indicating that endemic HCoVs still  
282 circulated between T1 and T2 despite SARS-CoV-2 related distancing and hygiene  
283 measures. Although cross-reactivity and/or cross-protection between SARS-CoV-2 and  
284 HCoVs have been hypothesized, our analyses did not find evidence for such effects. For

285 both Alpha- and Beta-coronaviruses, HCoV antibody responses were not associated with a  
286 lower likelihood of seroconversion following SARS-CoV-2 exposure. Along with frequent  
287 HCoV seronegativity in younger childhood, this strongly argues that the lower incidence of  
288 SARS-CoV-2 infection in children is not due to HCoV cross-protection. Moreover, there was  
289 no evidence for boosting of HCoV titers following SARS-CoV-2 infection. In contrast to other  
290 studies which did identify an effect for endemic HCoV infection, our cohort is composed of  
291 intensely exposed individuals from within the same households, which is a substantial  
292 strength compared to previous studies that have used pre-pandemic sera or indirect control  
293 groups<sup>18,30,34</sup>.

294 Limitations of our study include the potential recall-bias inherent to retrospective self- or  
295 parent-reporting of symptoms via questionnaires and physician-interviews. Additionally, PCR  
296 tests for SARS-CoV-2 during the first wave in Germany were mostly limited to the household  
297 index case, meaning it is possible that infected individuals were not identified as such,  
298 despite the multi-assay serological approach. However, the in-depth characterization of the  
299 humoral response provides valuable data for clinicians, public health officials and the public,  
300 at a time when children are increasingly viewed as a potential viral reservoir due to exclusion  
301 of pediatric populations from current vaccination strategies. Similarly, while PCR testing was  
302 not available for all individuals, the strength of this cohort comes from the comparatively  
303 large number of children, inclusion of children and adults from the same household, the  
304 inclusion of seronegative household members as well-matched controls, and the prospective  
305 longitudinal analysis of the humoral response in children for up to one year post-infection.  
306 The seropositive cohort also comprises almost exclusively individuals with mild or  
307 asymptomatic infections and so provides real-world data representative for the majority of  
308 SARS-CoV-2 infections in the community.

309 In summary, although children mostly show mild or even asymptomatic clinical courses  
310 following SARS-CoV-2 infection, they mount a strong and enduring humoral immune  
311 response. This strongly argues for sustained protection after infection, and might inform the  
312 design of vaccination strategies for SARS-CoV-2 convalescent children.

313 **References**

- 314 1. Cromer D, Juno JA, Khoury D, et al. Prospects for durable immune control of SARS-  
315 CoV-2 and prevention of reinfection. *Nat Rev Immunol* 2021;21(6):395–404.
- 316 2. Sette A, Crotty S. Adaptive immunity to SARS-CoV-2 and COVID-19. *Cell*  
317 2021;184(4):861–80.
- 318 3. Robbiani DF, Gaebler C, Muecksch F, Lorenzi JCC, Wang Z, Cho A. Convergent  
319 Antibody Responses to SARS-CoV-2 in Convalescent Individuals. *Nature*  
320 2020;584(7821):437–42.
- 321 4. Dan JM, Mateus J, Kato Y, et al. Immunological memory to SARS-CoV-2 assessed for  
322 up to 8 months after infection. *Science (80- )* 2021;371(6529):eabf4063.
- 323 5. Wheatley AK, Juno JA, Wang JJ, et al. Evolution of immune responses to SARS-CoV-  
324 2 in mild-moderate COVID-19. *Nat Commun* 2021;12(1):1162.
- 325 6. Seow J, Graham C, Merrick B, et al. Longitudinal observation and decline of  
326 neutralizing antibody responses in the three months following SARS-CoV-2 infection in  
327 humans. *Nat Microbiol* 2020;5(12):1598–607.
- 328 7. Bartsch YC, Wang C, Zohar T, et al. Humoral signatures of protective and pathological  
329 SARS-CoV-2 infection in children. *Nat Med* 2021;27(3):454–62.
- 330 8. Bloise S, Marcellino A, Testa A, et al. Serum IgG levels in children 6 months after  
331 SARS-CoV-2 infection and comparison with adults. *Eur J Pediatr* 2021;(May 22):1–8.
- 332 9. Bavaro DF, Laghetti P, Milano E, et al. Anti-spike S1 receptor-binding domain  
333 antibodies against SARS-CoV-2 persist several months after infection regardless of  
334 disease severity. *J Med Virol* 2021;93(5):3158–64.
- 335 10. Cotugno N, Ruggiero A, Bonfante F, et al. Virological and immunological features of  
336 SARS-CoV-2-infected children who develop neutralizing antibodies. *Cell Rep*  
337 2021;34(11):108852.

- 338 11. Pierce CA, Preston-Hurlburt P, Dai Y, et al. Immune responses to SARS-CoV-2  
339 infection in hospitalized pediatric and adult patients. *Sci Transl Med*  
340 2020;12(564):5487.
- 341 12. Selva KJ, van de Sandt CE, Lemke MM, et al. Systems serology detects functionally  
342 distinct coronavirus antibody features in children and elderly. *Nat Commun*  
343 2021;12(1):2037.
- 344 13. Weisberg SP, Connors TJ, Zhu Y, et al. Distinct antibody responses to SARS-CoV-2  
345 in children and adults across the COVID-19 clinical spectrum. *Nat Immunol*  
346 2021;22(1):25–31.
- 347 14. Yang HS, Costa V, Racine-Brzostek SE, et al. Association of Age with SARS-CoV-2  
348 Antibody Response. *JAMA Netw Open* 2021;4(3):e214302.
- 349 15. Waterfield T, Watson C, Moore R, et al. Seroprevalence of SARS-CoV-2 antibodies in  
350 children: A prospective multicentre cohort study. *Arch Dis Child* 2021;106(7):680–6.
- 351 16. Gudbjartsson DF, Norddahl GL, Melsted P, et al. Humoral Immune Response to  
352 SARS-CoV-2 in Iceland. *N Engl J Med* 2020;383(18):1724–34.
- 353 17. Anand SP, Prévost J, Nayrac M, et al. Longitudinal analysis of humoral immunity  
354 against SARS-CoV-2 Spike in convalescent individuals up to 8 months post-symptom  
355 onset. *Cell Reports Med* 2021;2(6):100290.
- 356 18. Anderson EM, Goodwin EC, Verma A, et al. Seasonal human coronavirus antibodies  
357 are boosted upon SARS-CoV-2 infection but not associated with protection. *Cell*  
358 2021;184(7):1858-1864.e10.
- 359 19. Sagar M, Reifler K, Rossi M, et al. Recent endemic coronavirus infection is associated  
360 with less-severe COVID-19. *J Clin Invest* 2021;131(1):e143380.
- 361 20. Becker M, Dulovic A, Junker D, et al. Immune response to SARS-CoV-2 variants of  
362 concern in vaccinated individuals. *Nat Commun* 2021;12(1):3109.

- 363 21. Becker M, Strengert M, Junker D, et al. Exploring beyond clinical routine SARS-CoV-2  
364 serology using MultiCoV-Ab to evaluate endemic coronavirus cross-reactivity. *Nat*  
365 *Commun* 2021;12(1):1152.
- 366 22. Khoury DS, Cromer D, Reynaldi A, et al. Neutralizing antibody levels are highly  
367 predictive of immune protection from symptomatic SARS-CoV-2 infection. *Nat Med*  
368 2021;(May 17).
- 369 23. Hall VJ, Foulkes S, Charlett A, et al. SARS-CoV-2 infection rates of antibody-positive  
370 compared with antibody-negative health-care workers in England: a large, multicentre,  
371 prospective cohort study (SIREN). *Lancet* 2021;397(10283):1459–69.
- 372 24. Earle KA, Ambrosino DM, Fiore-Gartland A, et al. Evidence for antibody as a  
373 protective correlate for COVID-19 vaccines. *Vaccine* 2021;(39):4423–8.
- 374 25. Zimmermann P, Curtis N. Why is COVID-19 less severe in children? A review of the  
375 proposed mechanisms underlying the age-related difference in severity of SARS-CoV-  
376 2 infections. *Arch Dis Child* 2021;106(5):429–39.
- 377 26. Viner RM, Mytton OT, Bonell C, et al. Susceptibility to SARS-CoV-2 Infection among  
378 Children and Adolescents Compared with Adults: A Systematic Review and Meta-  
379 Analysis. *JAMA Pediatr* 2021;175(2):143–56.
- 380 27. Götzinger F, Santiago-García B, Noguera-Julián A, et al. COVID-19 in children and  
381 adolescents in Europe: a multinational, multicentre cohort study. *Lancet Child Adolesc*  
382 *Heal* 2020;4(9):653–61.
- 383 28. Tönshoff B, Müller B, Elling R, et al. Prevalence of SARS-CoV-2 Infection in Children  
384 and Their Parents in Southwest Germany. *JAMA Pediatr* 2021;175(6):586–93.
- 385 29. Feng S, Phillips D, White T, et al. Correlates of Protection against symptomatic and  
386 asymptomatic SARS-CoV-2 infection. medRxiv.  
387 (<https://doi.org/10.1101/2021.06.21.21258528>). Preprint.



- 388 30. Dowell AC, Butler MS, Jinks E, et al. Children develop strong and sustained cross-  
389 reactive immune responses against Spike protein following SARS-CoV-2 infection,  
390 with enhanced recognition of variants of concern. April 29, 2021. medRxiv.  
391 (<https://doi.org/10.1101/2021.04.12.21255275>). Preprint.
- 392 31. Hansen CB, Jarlhelt I, Pérez-Alós L, et al. SARS-CoV-2 Antibody Responses Are  
393 Correlated to Disease Severity in COVID-19 Convalescent Individuals. *J Immunol*  
394 2021;206(1):109–17.
- 395 32. Huang AT, Garcia-Carreras B, Hitchings MDT, et al. A systematic review of antibody  
396 mediated immunity to coronaviruses: kinetics, correlates of protection, and association  
397 with severity. *Nat Commun* 2020;11(1):4704.
- 398 33. Zhou W, Wang W, Wang H, Lu R, Tan W. First infection by all four non-severe acute  
399 respiratory syndrome human coronaviruses takes place during childhood. *BMC Infect*  
400 *Dis* 2013;13(1):433.
- 401 34. Guo L, Wang Y, Kang L, et al. Cross-reactive antibody against human coronavirus  
402 OC43 spike protein correlates with disease severity in COVID-19 patients: a  
403 retrospective study. *Emerg Microbes Infect* 2021;10(1):664–76.
- 404

## 405 **Figure Legends**

406 **Figure 1: Children have a significantly higher humoral response to SARS-CoV-2 than**  
407 **adults.** The humoral response generated following SARS-CoV-2 household exposure with  
408 seroconversion was examined using MULTICOV-AB. Children (n=181) produced significantly  
409 more antibodies against the Spike (**a**,  $p<0.001$ ), RBD (**b**,  $p<0.001$ ), S1 domain (**c**,  $p<0.001$ )  
410 and nucleocapsid (NC) (**e**,  $p=0.01$ ) than adults (n=414). There was no significant difference  
411 for either the S2 domain (**d**,  $p=0.66$ ) or the N-terminal domain of the nucleocapsid (NC NTD)  
412 (**f**,  $p=0.40$ ). Only samples from T1 with a seropositive status (see Methods) are shown. Box  
413 and whisker plots with the box representing the median, 25th and 75th percentiles, while  
414 whiskers show the largest and smallest non-outlier values. Outliers were identified using  
415 upper/lower quartile  $\pm$  1.5 times IQR. Statistical significance was calculated using Mann-  
416 Whitney-U (two-sided) with significance defined as being  $*<0.01$ ,  $***<0.001$

417 **Figure 2: SARS-CoV-2 infections in children are more often asymptomatic than in**  
418 **adults, although dysgeusia is a good indicator of SARS-CoV-2 infection in both adults**  
419 **and children.** Box and whisker plots showing that there is no difference in antibody  
420 response between asymptomatic and symptomatic SARS-CoV-2 infections in adults (**a**,  
421  $p=0.684$ ,  $n=415$ ) or children (**b**,  $p=0.712$ ,  $n=185$ ). Boxes represent the median, 25th and 75th  
422 percentiles, while whiskers show the largest and smallest non-outlier values. Outliers were  
423 identified using upper/lower quartile  $\pm$  1.5 times IQR. Statistical significance was calculated  
424 using Mann-Whitney-U (two-sided). The four symptoms reported in this study were then  
425 examined for their frequency within the study population (**c**), with all symptoms more  
426 commonly reported in seropositive adults than seropositive children. Each symptom was  
427 then examined for its predictive ability to indicate SARS-CoV-2 infection (**d**), with dysgeusia a  
428 strong predictor in both adults (84.18%) and children (87.50%). All other symptoms were  
429 poor predictors in children (fever 59.46%, cough 37.37%, diarrhea 54.55%) compared to  
430 adults (fever 85.77%, cough 75.03%, diarrhea 80.65%). Only samples from T1 were  
431 analyzed for this figure (n=717 adults, 548 children). “+” indicates presence of the symptom  
432 “-“ indicates absence of the symptom.

433 **Figure 3 - Children and adults produce antibodies with equal neutralizing potential and**  
434 **their antibodies offer the same protection against Variants of Concern.** (a) Box and  
435 whisker plot showing that antibodies produced by children (n=118) have a significantly higher  
436 inhibition of ACE2 binding than those produced by adults (n=267,  $p < 0.001$ ) at T1 and T2  
437 ( $p = 0.02$ , child n=59, adult n=106) as determined by the sVNT assay. Boxes represent the  
438 median, 25th and 75th percentiles, while whiskers show the largest and smallest non-outlier  
439 values. Outliers were identified using upper/lower quartile  $\pm 1.5$  times IQR. Statistical  
440 significance was calculated using Mann-Whitney-U (two-sided) with \*\*\* indicating a p-value  
441  $< 0.001$ . To determine whether this was due to the higher titers in children, SARS-CoV-2 S1  
442 humoral response was determined using MULTICOV-AB for T1 and plotted against the  
443 results of the sVNT assay, with Spearman's rank used to determine the correlation (b),  
444 confirming that the increase in neutralization is due to higher titers. Protection against the  
445 Alpha (c) and Beta (d) VOCs was determined by MULTICOV-AB and plotted as a linear  
446 regression against the antibody binding response to the wild-type (wt) RBD, with Spearman's  
447 rank used to determine the correlation. There was no difference in antibody response  
448 between children (n=166, T1 samples only) and adults (n=381, T1 samples only) for either  
449 variant.

450 **Figure 4: HCoV offer no protection against SARS-CoV-2, nor do they show a boost-**  
451 **back antibody response following SARS-CoV-2 infection.** Samples from households with  
452 a known index case were examined with MULTICOV-AB to determine whether the antibody  
453 response to endemic coronaviruses (HCoV) provides any protection against infection with  
454 SARS-CoV-2. Initial screening of the population showed that seroprevalence increases with  
455 age, although several samples were within the blank range of the HCoV assays, indicating  
456 the presence of naïve samples (a). Naïve samples were defined as those having less than  
457 one-tenth the mean antibody response (indicated by dotted line), with the majority of these  
458 samples occurring in children under the age of 5. (b) Line graph showing the longitudinal  
459 response of these naïve samples from T1 to T2, with new infections in HCoV-OC43 shown in  
460 red. (c) Box and whisker plot showing there is no significant difference in HCoV-OC43

461 antibody response between SARS-CoV-2 seropositive and seronegative individuals, among  
462 either adults (n=440, p=0.974) or children (n=436, p=0.214). Boxes represent the median,  
463 25th and 75th percentiles, while whiskers show the largest and smallest non-outlier values.  
464 Outliers were identified using upper/lower quartile  $\pm$  1.5 times IQR. Statistical significance  
465 was calculated by Mann-Whitney-U (two-sided) with \*\*\* indicating a p-value <0.001 and ns  
466 indicating a p-value >0.01. (d) When comparing paired samples longitudinally within the  
467 SARS-CoV-2 seropositive subgroup, there was no increase in HCoV-OC43 S1 response in  
468 either adults (n=76) or children (n=103) following SARS-CoV-2 infection. Change in response  
469 is presented as log<sub>2</sub>-fold change from T1 to T2 and only samples with either log<sub>2</sub>-fold  
470 change greater than 1 or smaller than -1 are shown. Spearman's rank was used to calculate  
471 any correlation between the change in response for HCoV-OC43 and SARS-CoV-2. The  
472 same figures for the endemic coronaviruses HCoV-NL63, HCoV-HKU1 and HCoV-229E can  
473 be found as Supplementary figures 10 – 12.

474

475

476

477 **Author Contributions**

478 RE, HR, AJ, DF, PH, ARF and KMD conceived the study. HR, ADu, RE, AJ, PH, ARF, KMD  
479 and NSM designed the experiments. RE, HR, AJ, PH, ARF, KMD and NSM procured  
480 funding. ADu, MB, DJ, AS, RG, JM, AHi, CL, TG, ADi, DH, HH, AP, TI, TS and H-JG  
481 performed experiments. RE, HR, AJ, DF, MZ SB, LF, PF, AHa, JR, E-MJ, CE, MW, TG and  
482 MR collected samples or organized their collection. BJ, HS, MS, BT, GFH and BM supported  
483 the sample collection and provided key resources. PK, BT and UR produced the RBD  
484 mutants. HR, AJ, ADu, MB, DF, AHi, ADi, KK, SW, E-MJ, AP, TI, TS, H-JG, MW, CE, KMD  
485 and MR curated the data. MB and ADu performed the data analysis. ADu and MB generated  
486 the figures. ADu, HR, AJ and RE wrote the first draft of the manuscript. All authors approved  
487 the final version of the manuscript.

488 **Acknowledgements**

489 We thank Carmen Blum, Sevil Essig, Ulrike Formentini, Jens Gruber, Andrea Hänslér,  
490 Simone Hock, Ann Kathrin Horlacher, Jennifer Juengling, Gudrun Kirsch, Ingrid Knape,  
491 Helgard Knauss, Sonja Landthaler Alexandra Niedermeyer, Bianca Rippberger, Andrea  
492 Schuster, Boram Song, Ulrike Tengler, Mareike Walenta and Linda Wolf for assistance with  
493 sample processing and patient material storage. We are grateful for the FREEZE and HILDA  
494 biobank Freiburg for sample processing, in particular Ali-Riza Kaya; Marco Teller and Dirk  
495 Lebrecht. We thank Sandra Steinmann, Yvonne Müller, Vanessa Missel, Andrea Evers-  
496 Bischoff, Andrea Bevot and the CPCS at the University Hospital Tübingen for organizational  
497 support in conducting the study. We thank Steffen Keul for assistance with data processing.  
498 This work was financially supported by the State Ministry of Baden-Württemberg for  
499 Economic Affairs, Labour and Housing Construction (grant numbers FKZ-3-4332.62-NMI-67  
500 and FKZ-3-4332.62-NMI-68) to NSM and the Ministry of Science, Research and the Arts  
501 Baden-Württemberg within the framework of the special funding line for COVID-19 research  
502 to the Freiburg, Tübingen, Ulm and Heidelberg centers. The funders had no role in study  
503 design, data collection, data analysis or the decision to publish.

504 **Figure 1**

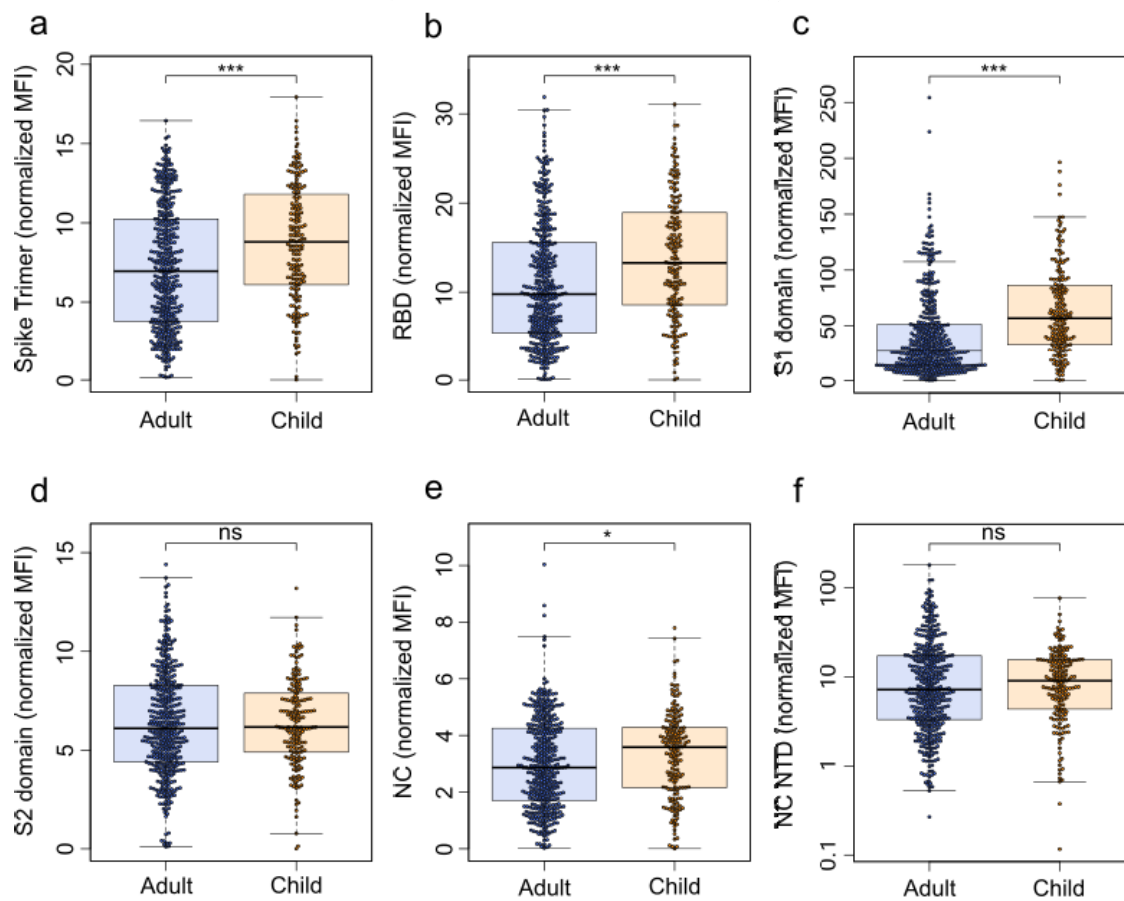

505

506

507 **Figure 2**

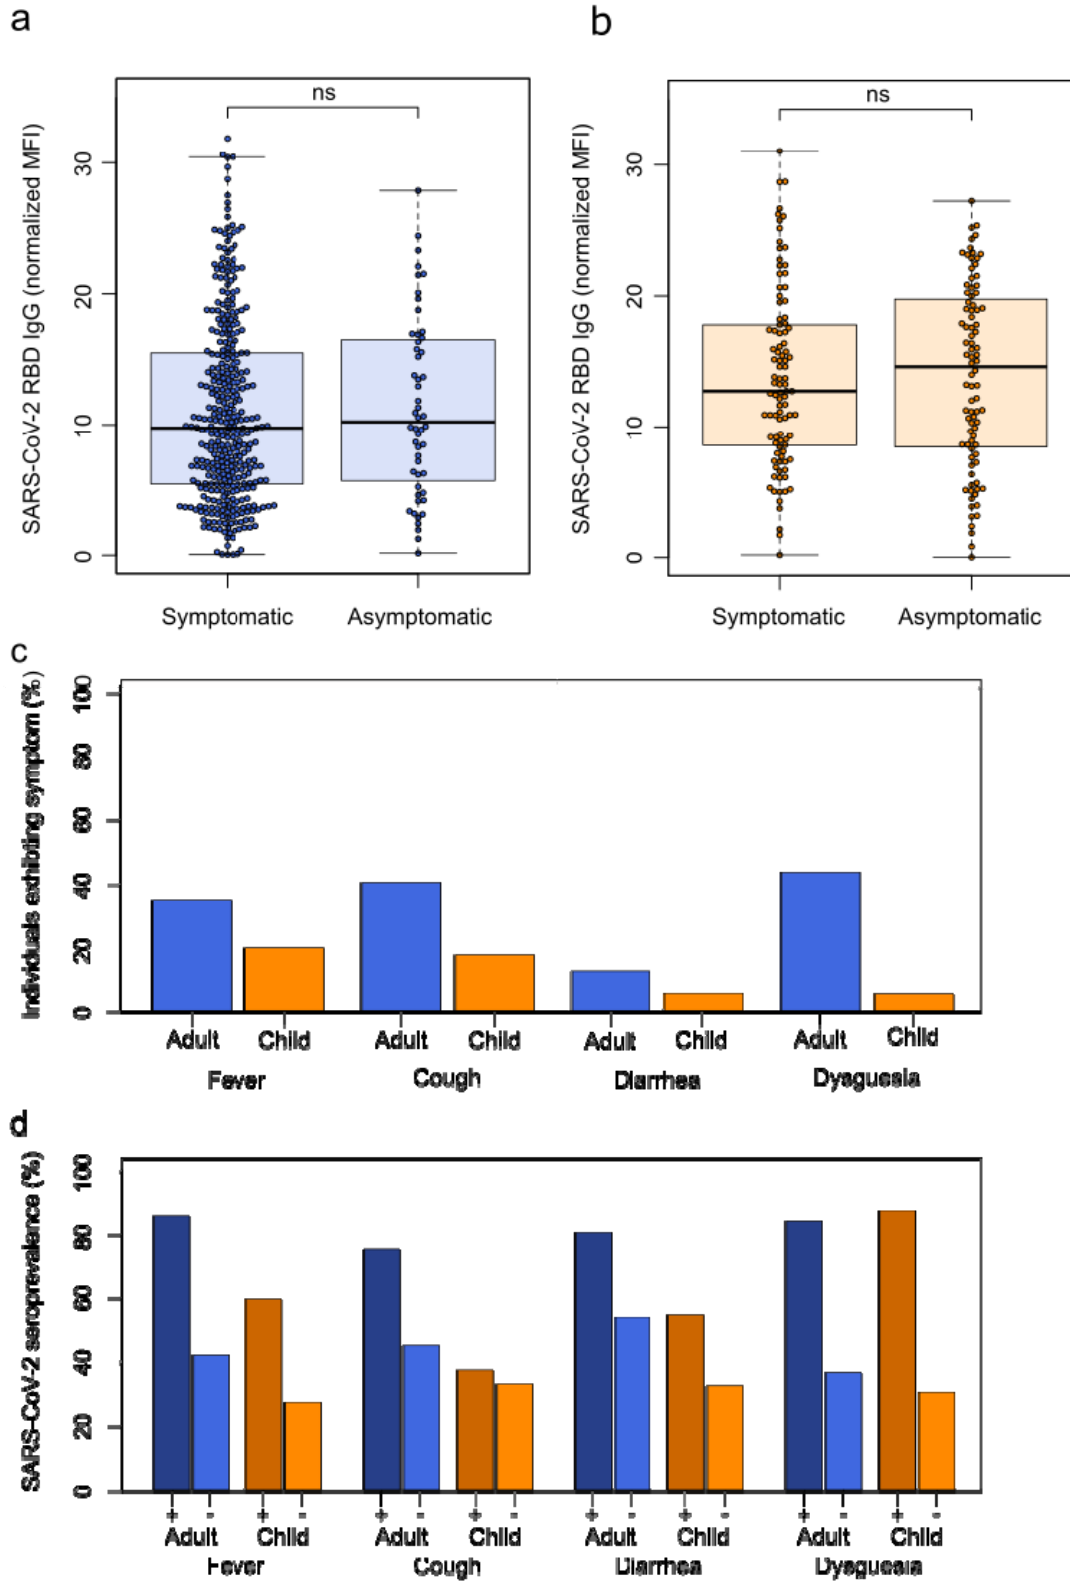

509 **Figure 3**

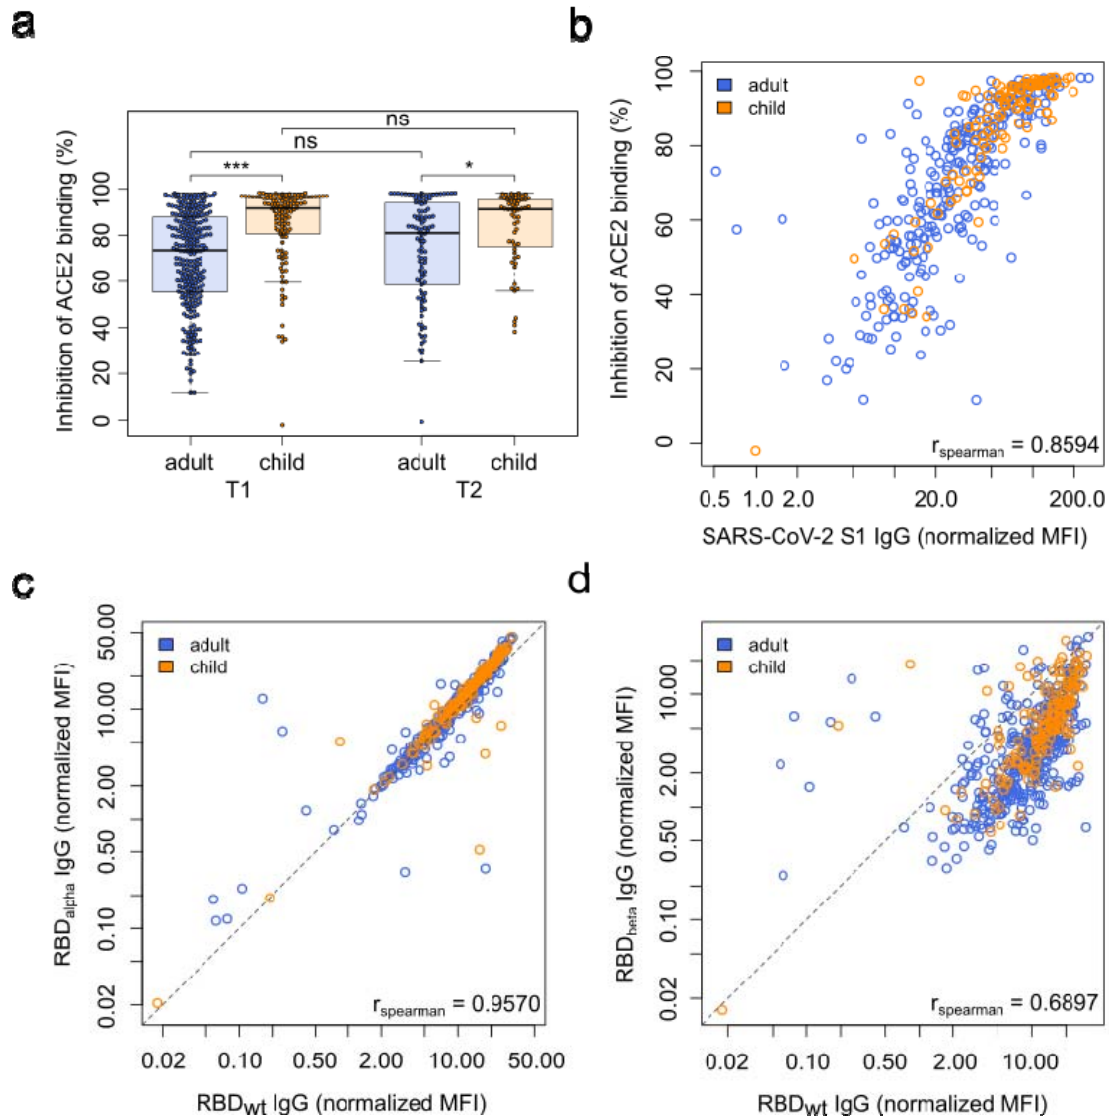

510

511

512



513 **Figure 4**

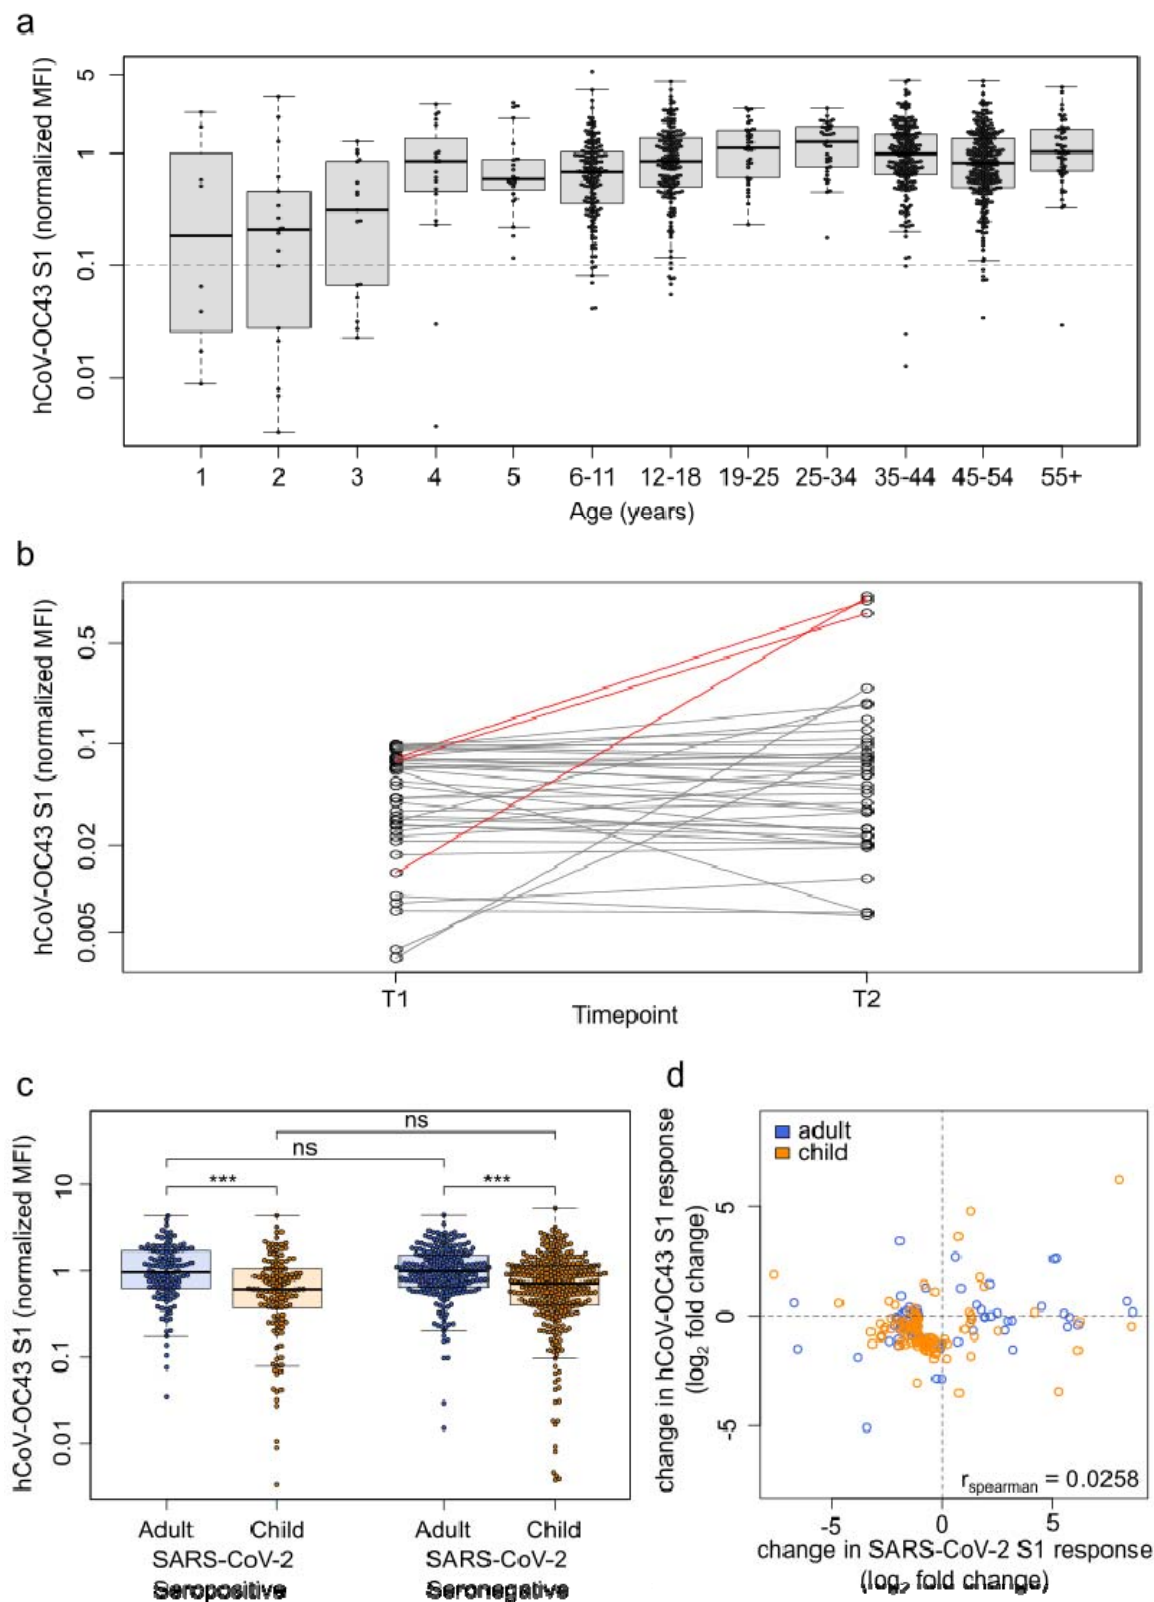

516 **Table 1 – Demographics and key information for the study cohort**

| Timepoint <sup>⊠</sup>                                                                  | T1 <sup>⊠</sup>                  |                                  | T2 <sup>⊠</sup>                  |                                  |
|-----------------------------------------------------------------------------------------|----------------------------------|----------------------------------|----------------------------------|----------------------------------|
| <b>Number-of-participants-by-age-group-(n)<sup>⊠</sup></b>                              | Adult-(717) <sup>⊠</sup>         | Children-(548) <sup>⊠</sup>      | Adult-(569) <sup>⊠</sup>         | Children-(402) <sup>⊠</sup>      |
| <b>Median-Age-yr-(IQR)<sup>⊠</sup></b>                                                  | 44-(37-49) <sup>⊠</sup>          | 10-(6-13) <sup>⊠</sup>           | 45-(38-50) <sup>⊠</sup>          | 10-(6-14) <sup>⊠</sup>           |
| <b>Number-of-females-(%)<sup>⊠</sup></b>                                                | 362-(50.49) <sup>⊠</sup>         | 277-(50.55) <sup>⊠</sup>         | 297-(52.20) <sup>⊠</sup>         | 202-(50.25) <sup>⊠</sup>         |
| <b>Smoker-(%)<sup>⊠</sup></b>                                                           | 75-(10.46) <sup>⊠</sup>          | 2-(0.36) <sup>⊠</sup>            | 62-(10.90) <sup>⊠</sup>          | 2-(0.50) <sup>⊠</sup>            |
| <b>BMI-(IQR)<sup>⊠</sup></b>                                                            | 25.37-(22.20-27.74) <sup>⊠</sup> | 17.41-(14.92-19.46) <sup>⊠</sup> | 24.69-(22.34-28.08) <sup>⊠</sup> | 16.96-(15.00-19.69) <sup>⊠</sup> |
| <b>Seropositive-(%)<sup>¶</sup></b>                                                     | 415-(57.88) <sup>¶</sup>         | 185-(33.76) <sup>¶</sup>         | 282-(49.56) <sup>¶</sup>         | 151-(37.56) <sup>¶</sup>         |
| - → <b>Asymptomatic-(%)<sup>¶</sup></b>                                                 | 36-(8.67) <sup>¶</sup>           | 83-(44.86) <sup>¶</sup>          | 31-(10.99) <sup>¶</sup>          | 69-(45.70) <sup>¶</sup>          |
| - → <b>Symptomatic-(%)<sup>⊠</sup></b>                                                  | 379-(91.33) <sup>⊠</sup>         | 102-(55.14) <sup>⊠</sup>         | 251-(89.01) <sup>⊠</sup>         | 82-(54.30) <sup>⊠</sup>          |
| <b>Seroreverted-at-T2-(%)<sup>⊠</sup></b>                                               | n/a <sup>⊠</sup>                 | n/a <sup>⊠</sup>                 | 71-(17.11) <sup>⊠</sup>          | 7-(3.78) <sup>⊠</sup>            |
| <b>Symptoms-at-disease-onset-(of-seropositive)<sup>¶</sup></b>                          |                                  |                                  |                                  |                                  |
| - → <b>Fever-(%)<sup>¶</sup></b>                                                        | 217-(52.29) <sup>¶</sup>         | 66-(35.68) <sup>¶</sup>          | 151-(53.55) <sup>¶</sup>         | 49-(32.45) <sup>¶</sup>          |
| - → <b>Cough-(%)<sup>¶</sup></b>                                                        | 221-(53.25) <sup>¶</sup>         | 37-(20.00) <sup>¶</sup>          | 154-(54.61) <sup>¶</sup>         | 33-(21.85) <sup>¶</sup>          |
| - → <b>Dysgeusia-(%)<sup>¶</sup></b>                                                    | 266-(64.10) <sup>¶</sup>         | 28-(15.14) <sup>¶</sup>          | 176-(62.41) <sup>¶</sup>         | 24-(15.89) <sup>¶</sup>          |
| - → <b>Diarrhea-(%)<sup>⊠</sup></b>                                                     | 75-(18.07) <sup>⊠</sup>          | 18-(9.73) <sup>⊠</sup>           | 55-(19.50) <sup>⊠</sup>          | 16-(10.60) <sup>⊠</sup>          |
| <b>Median-(IQR)-days-from-positive-PCR-test-result-to-timepoint<sup>⊠</sup></b>         | 96-(63-120) <sup>⊠</sup>         |                                  | 333-(319-353) <sup>⊠</sup>       |                                  |
| <b>Median-(IQR)-days-from-symptoms-onset-to-timepoint-(of-seropositive)<sup>⊠</sup></b> | 109-(67-122) <sup>⊠</sup>        |                                  | 340-(322-356) <sup>⊠</sup>       |                                  |
| <b>Hospitalised-(of-seropositive)-(%)<sup>⊠</sup></b>                                   | 15-(3.61) <sup>⊠</sup>           | 0-(0.00) <sup>⊠</sup>            | n/a <sup>⊠</sup>                 |                                  |
| <b>Vaccinated-(%)<sup>⊠</sup></b>                                                       | n/a <sup>⊠</sup>                 | n/a <sup>⊠</sup>                 | 24-(4.22) <sup>⊠</sup>           | 1-(0.25) <sup>⊠</sup>            |
| <b>Number-of-households<sup>⊠</sup></b>                                                 | 328 <sup>⊠</sup>                 |                                  | 279 <sup>⊠</sup>                 |                                  |
| <b>Median-(IQR)-number-of-household-members<sup>⊠</sup></b>                             | 4-(3-4) <sup>⊠</sup>             |                                  | 4-(3-4) <sup>⊠</sup>             |                                  |

517

518 See methods for definition of how samples were defined as being seropositive,  
 519 asymptomatic or symptomatic. Median time from positive PCR test to time point (n=368 at  
 520 T1, n=310 at T2) and median time from symptoms onset to time point (n=349 at T1, n=243 at  
 521 T2) are calculated using adult samples for which this data was available.

522
